# Supplementary material for: Molecular ferroelectric pyridin-2-ylmethanaminium perchlorate with phase transition induced by disorder of perchlorate
Source: Royal Society of Chemistry journal article supplement (doi:10.1039/c8ra10031d), 2019-01-01
Supplement: c8ra10031d1.pdf [file c8ra10031d1.pdf]

## Supporting Information

### Molecular Ferroelectric Pyridin-2-ylmethanaminium Perchlorate with Phase Transition Induced by Disorder of Perchlorate

Xuecheng Gan, Zheng Tang, Wenjun Zhang, Cong Xu, Xiaofan Sun, Zhangran Gao, Yizhang Wu,  
Hong-Ling Cai\* and X. S. Wu\*

Collaborative Innovation Center of Advanced Microstructures, Lab of Solid State Microstructures,  
School of Physics, Nanjing University, Nanjing 210093, P. R. China

**Table S1.** Crystal data and geometry details of compound **1**.

|                          | The LTP                                                                      | The HTP                                                                      |
|--------------------------|------------------------------------------------------------------------------|------------------------------------------------------------------------------|
| Chemical formula         | C <sub>6</sub> H <sub>10</sub> Cl <sub>2</sub> N <sub>2</sub> O <sub>8</sub> | C <sub>6</sub> H <sub>10</sub> Cl <sub>2</sub> N <sub>2</sub> O <sub>8</sub> |
| Mr                       | 309.06                                                                       | 309.06                                                                       |
| Space group              | P 2 <sub>1</sub>                                                             | P 2 <sub>1</sub> /c                                                          |
| Temperature (K)          | 173K                                                                         | 293K                                                                         |
| a (Å)                    | 11.7656(10)                                                                  | 11.868(7)                                                                    |
| b (Å)                    | 15.0880(1)                                                                   | 15.208(9)                                                                    |
| c (Å)                    | 13.1523(10)                                                                  | 13.240(8)                                                                    |
| β                        | 91.7930(5)                                                                   | 92.470(9)                                                                    |
| Volume (Å <sup>3</sup> ) | 2333.7(3)                                                                    | 2387(2)                                                                      |
| Z                        | 8                                                                            | 8                                                                            |
| R, wR2, S                | 0.1085, 0.3512, 1.173                                                        | 0.0856, 0.2727, 0.890                                                        |
| Bond length (Å)          | LTP                                                                          | HTP                                                                          |
| C1-C2                    | 1.327(15)                                                                    | 1.351(7)                                                                     |
| C2-C3                    | 1.411(18)                                                                    | 1.365(9)                                                                     |
| C3-C4                    | 1.360(16)                                                                    | 1.374(7)                                                                     |
| C4-C5                    | 1.394(15)                                                                    | 1.378(6)                                                                     |
| C1-N1                    | 1.380(13)                                                                    | 1.352(6)                                                                     |
| C5-N1                    | 1.329(12)                                                                    | 1.321(5)                                                                     |
| C5-C6                    | 1.501(14)                                                                    | 1.506(5)                                                                     |
| C6-N2                    | 1.475(13)                                                                    | 1.496(5)                                                                     |
| C7-C8                    | 1.426(15)                                                                    | 1.329(8)                                                                     |
| C8-C9                    | 1.293(17)                                                                    | 1.341(8)                                                                     |
| C9-C10                   | 1.452(16)                                                                    | 1.491(9)                                                                     |
| C10-C11                  | 1.373(16)                                                                    | 1.353(7)                                                                     |
| C7-N3                    | 1.321(13)                                                                    | 1.332(7)                                                                     |
| C11-N3                   | 1.312(15)                                                                    | 1.333(6)                                                                     |
| C11-C12                  | 1.508(15)                                                                    | 1.504(6)                                                                     |
| C12-N4                   | 1.539(12)                                                                    | 1.497(5)                                                                     |
| Bond angle(°)            | LTP                                                                          | HTP                                                                          |

|             |          |          |
|-------------|----------|----------|
| C1-C2-C3    | 118.4(5) | 118.2(4) |
| C2-C3-C4    | 120.7(6) | 120.0(4) |
| C3-C4-C5    | 119.1(6) | 120.6(4) |
| C4-C5-N1    | 118.0(5) | 117.6(4) |
| N1-C1-C2    | 119.9(6) | 120.8(4) |
| C1-N1-C5    | 122.9(5) | 122.7(4) |
| C4-C5-C6    | 119.8(5) | 124.0(3) |
| N1-C5-C6    | 121.8(5) | 118.3(3) |
| C5-C6-N2    | 109.5(5) | 110.2(3) |
| C7-C8-C9    | 119.4(5) | 122.6(4) |
| C8-C9-C10   | 122.4(6) | 118.0(4) |
| C9-C10-C11  | 117.1(6) | 116.4(4) |
| C10-C11-N3  | 115.9(6) | 119.5(4) |
| N3-C7-C8    | 114.4(6) | 118.2(4) |
| C7-N3-C11   | 130.0(6) | 124.9(4) |
| C10-C11-C12 | 125.7(6) | 123.7(4) |
| N3-C11-C12  | 118.3(5) | 116.8(3) |
| C11-C12-N4  | 108.3(5) | 111.1(3) |

**Table S2.** The frequency-dependent Curie constants of Curie-Weiss law of the heating process.

| Frequency | $C_{\text{para}}(\text{K})$ | $C_{\text{ferro}}(\text{K})$ |
|-----------|-----------------------------|------------------------------|
| 500Hz     | 68                          | 250                          |
| 1 kHz     | 76                          | 256                          |
| 5kHz      | 120                         | 345                          |
| 10kHz     | 118                         | 263                          |
| 100kHz    | 150                         | 416                          |
| 1 MHz     | 263                         | 526                          |

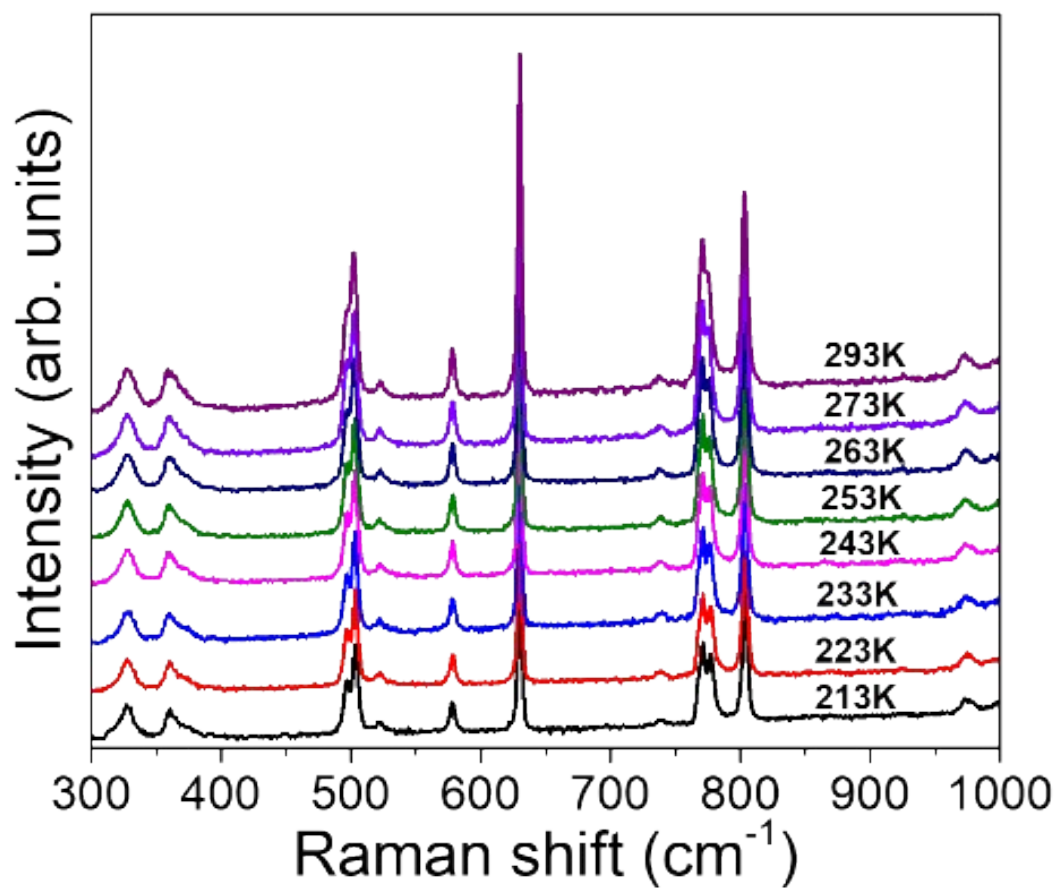

**Figure S1.** Raman spectra of compound 1 within the selected wavenumber range at different temperatures.

In order to understand the phase transition mechanism, the temperature evolution of Raman spectra has been conducted cooling down from room temperature to 213 K. Figure S1 presents the Raman spectra in the frequents range of 300–1000  $\text{cm}^{-1}$  in cooling process.

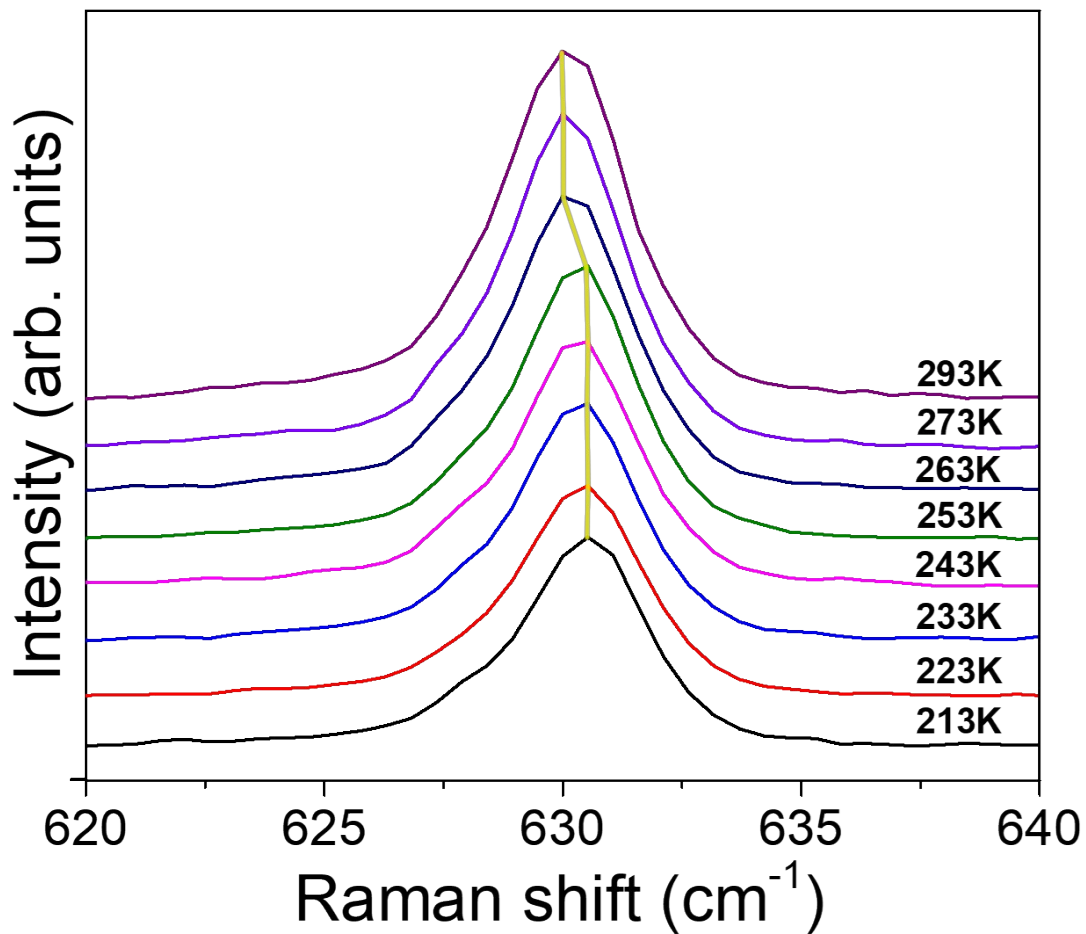

**Figure S2.** Raman peak position shifts at 628 cm<sup>-1</sup> at different temperatures.

Since the vibration at 628 cm<sup>-1</sup> comes from the inplane deformation of the perchlorate anion. By variable temperature Raman peak position shifts before and after the phase transition at 628 cm<sup>-1</sup>, it can also be seen that the change of Raman peak position shifts before and after the phase transition. In other words, the disorder of perchloric acid changes before and after the phase transition.
